# Supplementary material for: Construction of hybrid d10 metal–organic frameworks by flexible aromatic dicarboxylate and N-donor ligands : syntheses, structures and physical properties
Source: Royal Society of Chemistry journal article supplement (doi:10.1039/b916280c), 2009-01-01
Supplement: b916280c.pdf [file b916280c.pdf]

## **Supplementary Information for:**

# **Construction of hybrid $d^{10}$ metal-organic frameworks by flexible aromatic dicarboxylate and N-donor ligands: Syntheses, structures and physical properties**

**Guang-Xiang Liu,\*<sup>a</sup> Kun Zhu,<sup>a</sup> Huan-Min Xu,<sup>a</sup> Sadafumi Nishihara,<sup>b</sup> Rong-Yi Huang\*<sup>a</sup> and Xiao-Ming Ren<sup>a</sup>**

*<sup>a</sup>Anhui Key Laboratory of Functional Coordination Compounds, School of Chemistry and Chemical Engineering, Anqing Normal University, Anqing 246003, P. R. China*

*<sup>b</sup>Department of Physical Science, Graduate School of Science, Osaka Prefecture University, Sakai, Osaka 599-8531, Japan*

E-mail: liugx@live.com and huangrongyi@aqtc.edu.cn

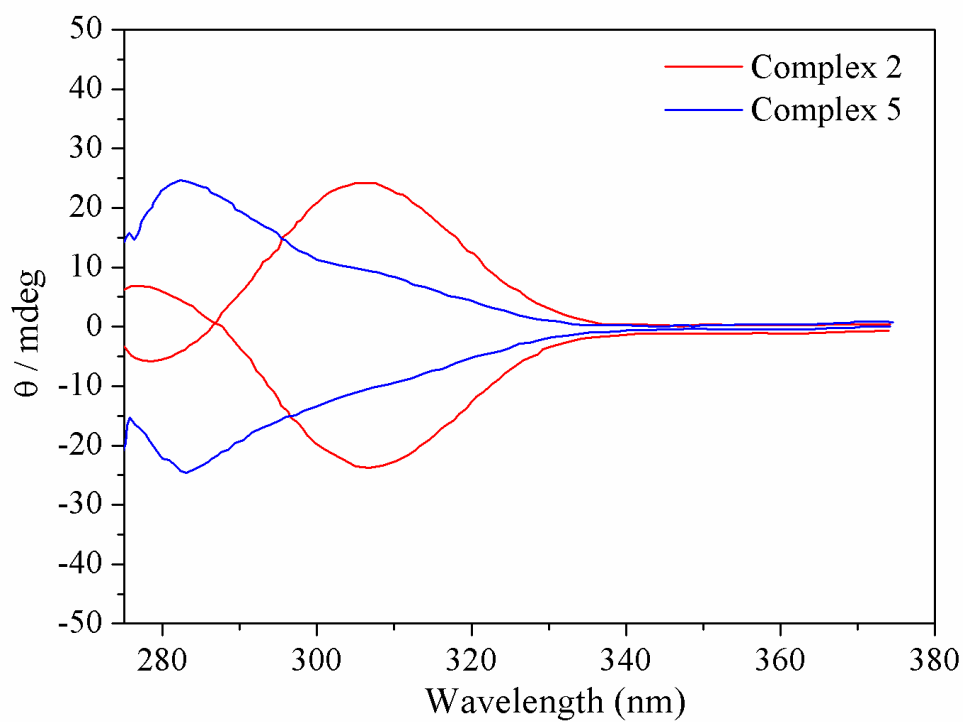

Fig. S1. Solid-state CD spectra of complexes **2** and **5** (KBr disk).

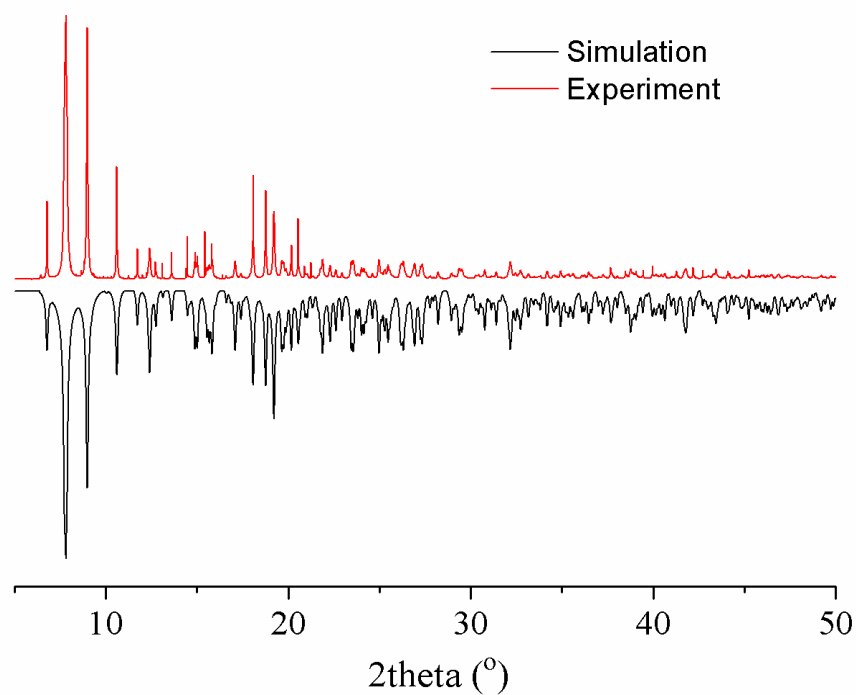

Fig. S2. X-Ray power diffraction profiles of complex **3**.
